# Supplementary material for: A Simple Frailty Score Predicts Survival and Early Mortality in Systemic AL Amyloidosis
Source: MDPI journal article supplement (doi:10.3390/cancers16091689), 2024-04-26
Supplement: s1 [file s1]

SUPPORTING INFORMATION

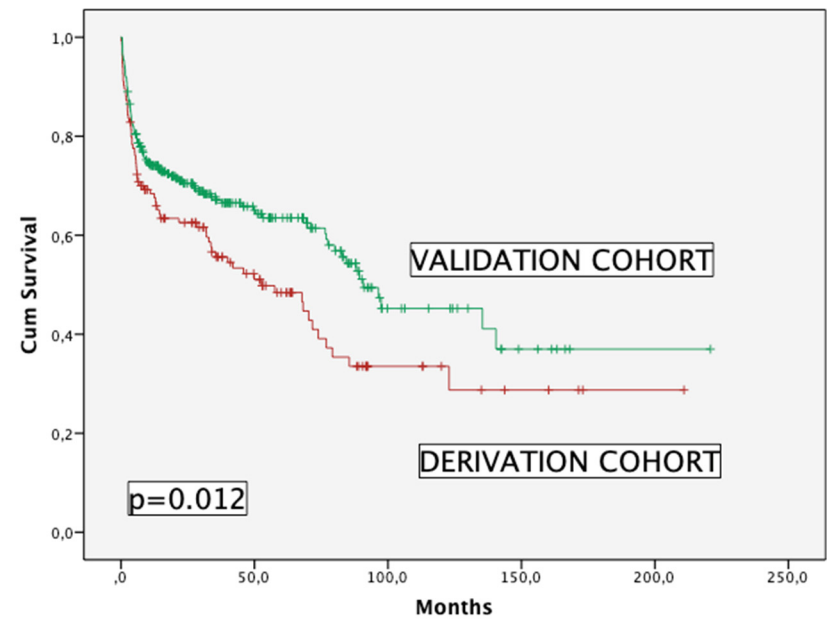

**Figure S1.** Overall survival in derivation and validation cohorts.

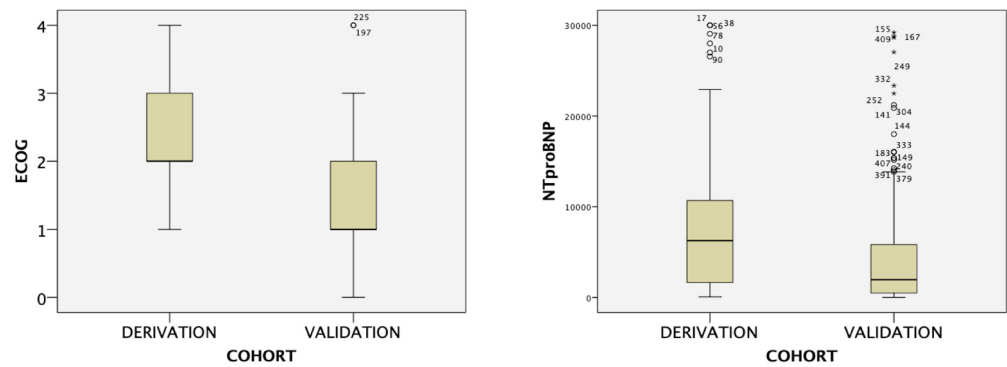

ECOG: Eastern Cooperative Oncology Group Performance Status, NT-proBNP: N-terminal pro-type-B natriuretic peptide,

**Figure S2.** Box-plot showing differences in ECOG and NTproBNP between both cohorts.

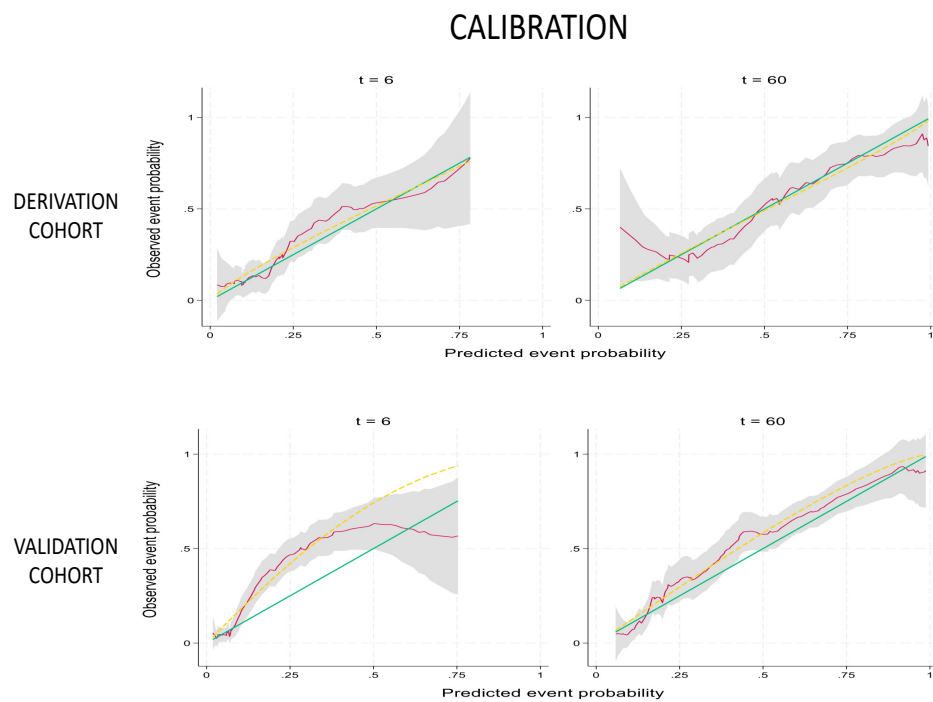

**Figure S3.** Calibration of both cohorts.

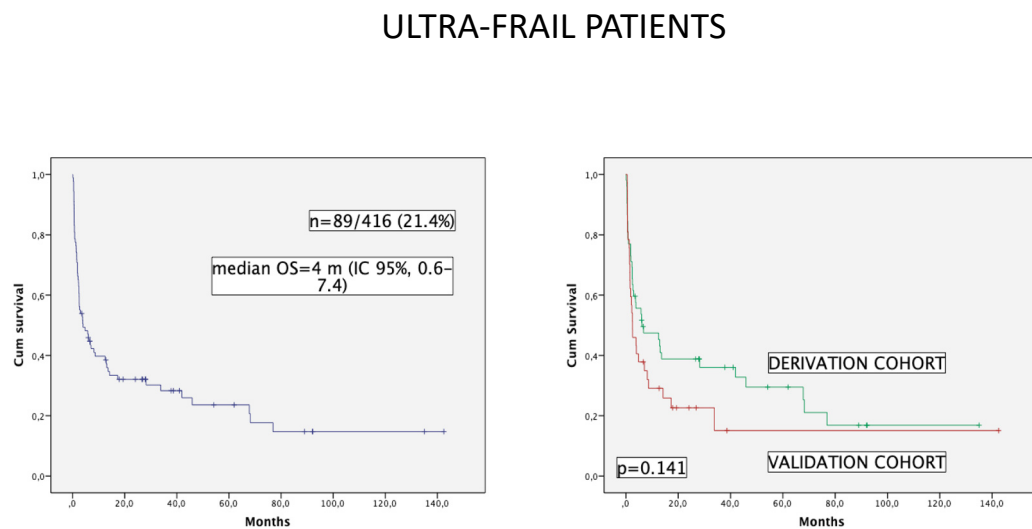

IC: Confidence Interval, mOS: median overall survival, m:months

**Figure S4.** Overall survival of ultra-frail patients.

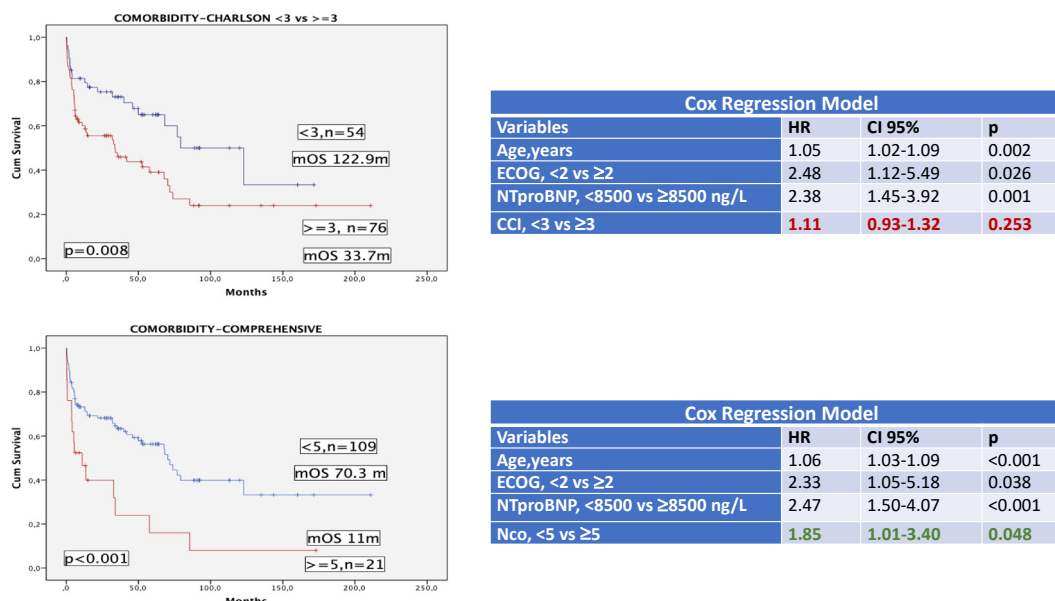

CI: confidence interval, CCI: Charlson Comorbidity Index, ECOG: Eastern Cooperative Oncology Group Performance Status, HR: hazard ratio, Nco: number of comorbidities (comprehensive approach), NT-proBNP: N-terminal pro-type-B natriuretic peptide, m: months, mOS: median overall survival

**Figure S5.** Overall survival and Cox regression models to assess comorbidity according with Charlson Comorbidity Index (< 3 vs ≥ 3) or number of comorbidities by a comprehensive approach (< 5 vs ≥ 5).

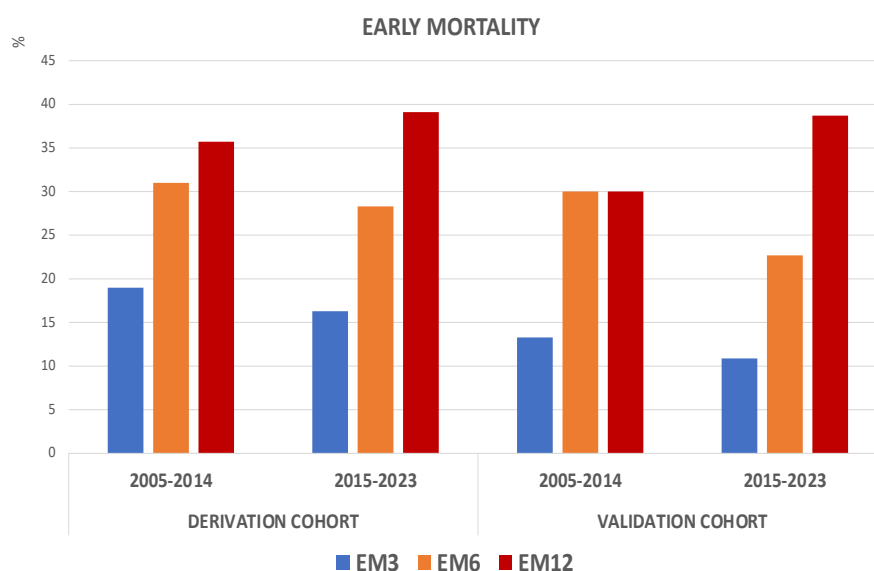

**Figure S6.** Early mortality (EM) at 3, 6, and 12 months according to cohort and period of time.

**Table S1.** Percentage of comorbidities in the derivation cohort (comprehensive approach).

| COMORBIDITY                   | %    |
|-------------------------------|------|
| Hyperlipemia                  | 54.6 |
| Hypertension                  | 45.4 |
| Heart disease                 | 36.4 |
| Lung disease                  | 20.9 |
| Multiple myeloma              | 19.4 |
| Type 2 diabetes               | 17.8 |
| Neurological disorder         | 15.5 |
| Obesity                       | 13.7 |
| Prior malignancy              | 12.4 |
| Gastrointestinal disease      | 11.1 |
| Thromboembolism               | 10.9 |
| MGUS                          | 9.2  |
| Psychiatric disorder          | 8.6  |
| Liver disease                 | 7.8  |
| Rheumatologic disorder        | 5.4  |
| Low weight                    | 4.7  |
| Waldenström macroglobulinemia | 3    |
| Hepatitis B virus             | 2.3  |
| Cutaneous disease             | 1.6  |
| Hepatitis C virus             | 0.8  |
| Splenectomy                   | 0.8  |
| Human immunodeficiency virus  | 0    |

**Table S2.** Percentage of patients with high-risk variables in both cohorts for the three early mortality cutoffs (3, 6, and 12 months).

|                 | <b>EM3</b> |            | <b>EM6</b> |            | <b>EM12</b> |            |
|-----------------|------------|------------|------------|------------|-------------|------------|
|                 | <b>DER</b> | <b>VAL</b> | <b>DER</b> | <b>VAL</b> | <b>DER</b>  | <b>VAL</b> |
| <b>AGE ≥70</b>  | 43.5       | 59.5       | 48.7       | 59.4       | 51          | 49.5       |
| <b>ECOG ≥2</b>  | 95.6       | 70.3       | 92.3       | 62.5       | 86.3        | 50.5       |
| <b>NT ≥8500</b> | 91.3       | 62.2       | 69.2       | 43.8       | 58.8        | 35.1       |
| <b>Nco5</b>     | 23.8       |            | 47.6       |            | 61.9        |            |

DER: Derivation Cohort, ECOG PS: Eastern Cooperative Oncology Group Performance Status, EM: Early Mortality, NT-proBNP: N-terminal pro–type-B natriuretic peptide, Nco5: Five or more comorbidities, VAL: Validation Cohort
